# Supplementary material for: A co-type ductile film with high tensile strength and fast self-healing properties for shaped fruit preservation
Source: Royal Society of Chemistry journal article supplement (doi:10.1039/d3tb02862c), 2024-01-01
Supplement: d3tb02862c4.pdf [file d3tb02862c4.pdf]

# Supplementary Material

## A co-type ductile film with high tensile strength and fast self-healing properties for shaped fruit preservation

Li Liu<sup>a,b</sup>, Yuancheng Zhang<sup>a</sup>, Fengqiong Jiang<sup>a</sup>, Qiuwen He<sup>a</sup>, Baofeng Lin<sup>a\*</sup>

<sup>a</sup>School of Chemistry and Chemical Engineering, Guangxi University,

Nanning 530004, P. R. China.

\*Corresponding Author: Baofeng Lin, E-mail: lbf@gxu.edu.cn

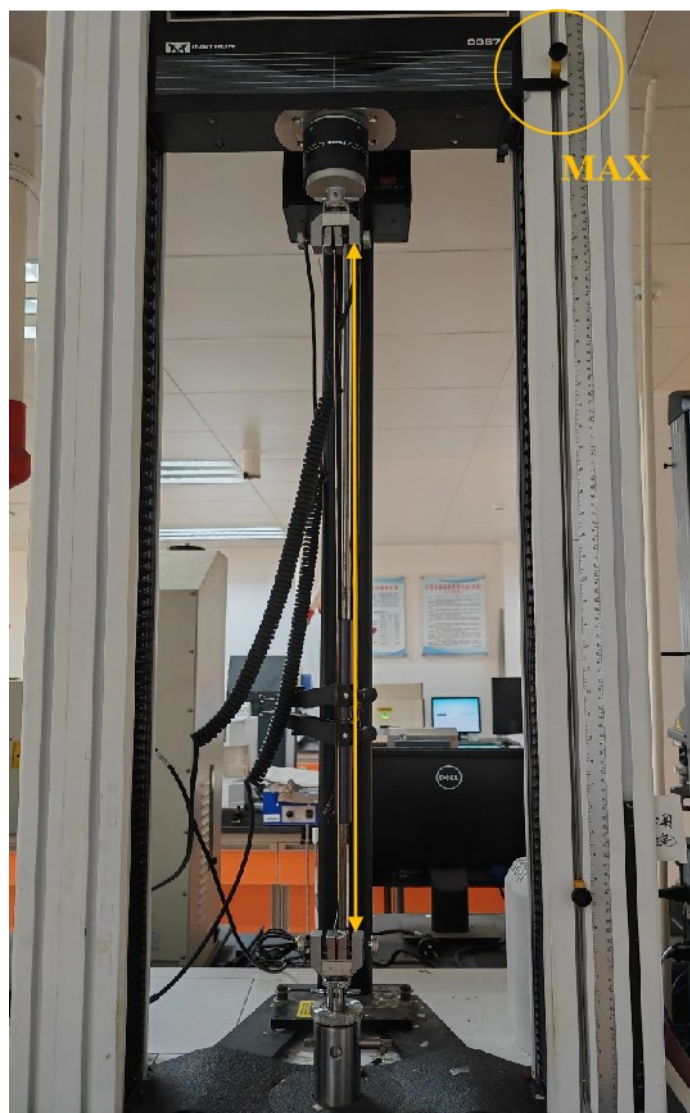

Fig. S1. The maximum elongation at break over 5500% (Strain behavior of CTPB hydrogel at the peak of test on an electronic universal testing machine)

**Table. S1. Comparison of the properties of hydrogels with different compositions**

| Base of hydrogel | Functional additives                   | Strain (%) | Self-healing | Antibacterial | References |
|------------------|----------------------------------------|------------|--------------|---------------|------------|
| CMCS             | Cellulose/Zn <sup>2+</sup>             | 22         | -            | ✓             | 1          |
| CS/PVA/Guar gum  | HCA                                    | 40         | -            | ✓             | 2          |
| PVA/IN           | -                                      | 100        | -            | -             | 3          |
| Guar gum         | CNCs/Fe <sup>3+</sup>                  | 170        | 12h          | -             | 4          |
| PVA/CMC          | PEI/TA                                 | 400        | ✓            | -             | 5          |
| PVA/CS           | TA                                     | 440        | -            | ✓             | 6          |
| CS/PVA           | porous g-C <sub>3</sub> N <sub>4</sub> | 450        | -            | ✓             | 7          |
| PVA-Borax        | CNFs-PPy                               | 600        | 20s          | -             | 8          |
| PVA-Borax        | TA@CNC                                 | 916        | 25s          | -             | 9          |
| PVA-Borax        | CNFs                                   | 1000       | ✓            | -             | 10         |
| PVA-SA-AN        | TA/CTAB                                | 2264       | -            | -             | 11         |
| PVA-Borax        | Starch                                 | 2485       | 81min        | -             | 12         |
| PVA/TA           | Ag/CNC                                 | 4100       | 10min        | ✓             | 13         |
| PVA-Borax        | Silk Fibroin                           | 5000       | ✓            | -             | 14         |
| ★This work       |                                        | >5500%     | Within 8s    | Within 60s    |            |

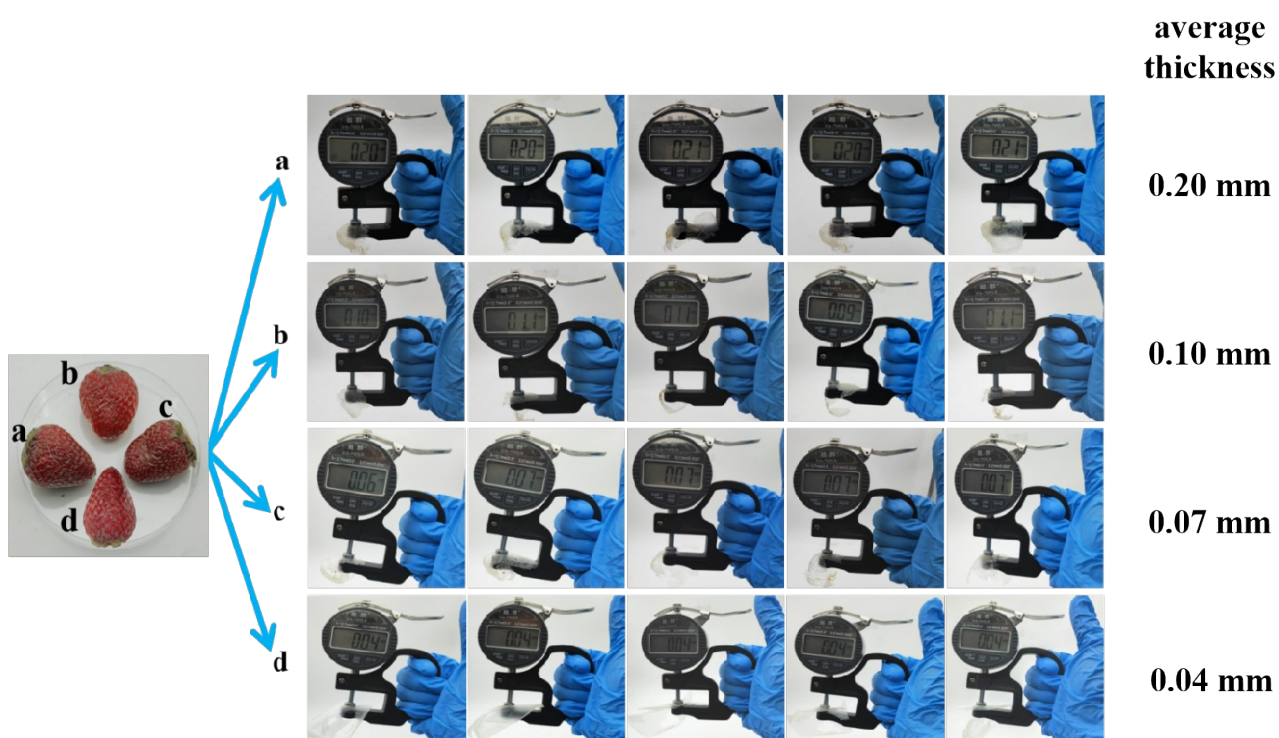

|     | 0% | 0.1% | 0.2% | 0.3% | 0.4% |
|-----|----|------|------|------|------|
| 0d  | 8  | 8    | 8    | 8    | 8    |
| 7d  | 8  | 8    | 8    | 8    | 8    |
| 15d | 8  | 8    | 8    | 8    | 8    |
| 22d | 6  | 8    | 8    | 8    | 8    |
| 29d | 5  | 8    | 8    | 8    | 8    |

Fig. S2. Controllable thickness and uniform texture of CTPB hydrogel film

Fig. S3. Survival of zebrafish at different hydrogel concentrations

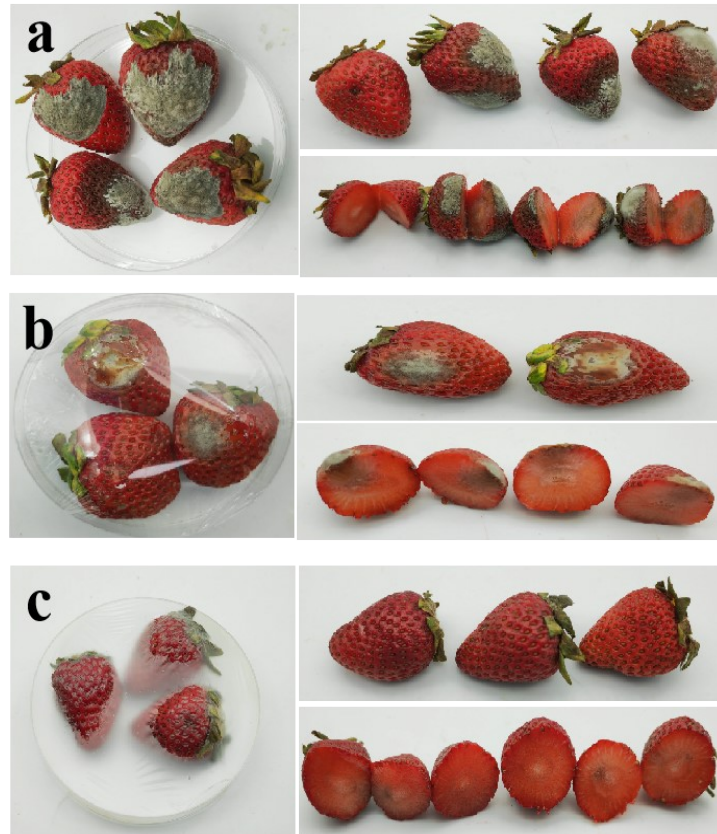

**Fig. S4. Cross-sections of strawberries under different storage conditions. (a) Cross-section of blank group; (b) Cross-section of PE film; (c) Cross-section of CTPB hydrogels film;**

## References

1. Y. Liao, C. Wang, C. Huang, S. Y. Hussain Abdalkarim, L. Wang, Z. Chen and H.-Y. Yu, *ACS Sustainable Chemistry & Engineering*, 2023, **11**, 5908-5917.
2. V. G. Bhat, S. S. Narasagoudr, S. P. Masti, R. B. Chougale and Y. Shanbhag, *Int J Biol Macromol*, 2021, **177**, 166-175.
3. X. Xu, L. Li, S. M. Seraji, L. Liu, Z. Jiang, Z. Xu, X. Li, S. Zhao, H. Wang and P. Song, *Macromolecules*, 2021, **54**, 9510-9521.
4. Q. Fan, C. Jiang, W. Wang, L. Bai, H. Chen, H. Yang, D. Wei and L. Yang, *Cellulose*, 2020, **27**, 2541-2553.
5. Y. Zhao, S. Zhou, X. Xia, M. Tan, Y. Lv, Y. Cheng, Y. Tao, J. Lu, J. Du and H. Wang, *Int J Biol Macromol*, 2022, **223**, 1126-1137.
6. W. Guo, M. Yang, S. Liu, X. Zhang, B. Zhang and Y. Chen, *Iranian Polymer Journal*, 2021, **30**, 1159-1168.
7. S. Liu, X. Gao, H. Fan, M. Zhang, G. I. N. Waterhouse and S. Zhu, *Int J Biol Macromol*, 2023, **236**, 123974.
8. Q. Ding, X. Xu, Y. Yue, C. Mei, C. Huang, S. Jiang, Q. Wu and J. Han, *ACS Appl Mater Interfaces*, 2018, **10**, 27987-28002.
9. C. Shao, L. Meng, M. Wang, C. Cui, B. Wang, C.-R. Han, F. Xu and J. Yang, *ACS Applied Materials & Interfaces*, 2019, **11**, 5885-5895.
10. H. Takeno, H. Inoguchi and W.-C. Hsieh, *Cellulose*, 2020, **27**, 4373-4387.
11. Y. Zheng, H. Huang, J. Yu, Z. Hu and Y. Wang, *Chemical Engineering Journal*, 2023, **454**.
12. Y. Qin, J. Wang, C. Qiu, X. Xu and Z. Jin, *J Agric Food Chem*, 2019, **67**, 3966-3980.
13. F. Lin, Z. Wang, Y. Shen, L. Tang, P. Zhang, Y. Wang, Y. Chen, B. Huang and B. Lu, *Journal of Materials Chemistry A*, 2019, **7**, 26442-26455.
14. N. Yang, P. Qi, J. Ren, H. Yu, S. Liu, J. Li, W. Chen, D. L. Kaplan and S. Ling, *ACS Appl Mater Interfaces*, 2019, **11**, 23632-23638.
